# Supplementary material for: Development and Evaluation of an Enterovirus D68 Real-Time Reverse Transcriptase PCR Assay
Source: PubMed Central journal article supplement — J Clin Microbiol. 2015 Jul 20;53(8):2641–7. doi: 10.1128/JCM.00923-15 (PMC4508392; doi:10.1128/jcm.00923-15), 2015-07-20
Supplement: JCM.00923-15_zjm999094421so1.pdf [file JCM.00923-15_zjm999094421so1.pdf]

**Table S1.** Enteroviruses and rhinoviruses tested for cross-reactivity with WashU RT-PCR assays

| ID                    | Entero   Rhino | Type                     | Extraction               | Source                              |
|-----------------------|----------------|--------------------------|--------------------------|-------------------------------------|
| WU-ER-1 <sup>†</sup>  | Rhinovirus     | W45 (HRVC)               | NucliSENS easyMAG        | St. Louis Children's Hospital       |
| WU-ER-2 <sup>†</sup>  | Rhinovirus     | W11 (HRVC)               | NucliSENS easyMAG        | St. Louis Children's Hospital       |
| WU-ER-3 <sup>†</sup>  | Rhinovirus     | W47 (HRVC)               | NucliSENS easyMAG        | St. Louis Children's Hospital       |
| WU-ER-4 <sup>†</sup>  | Rhinovirus     | R16 (HRVA)               | NucliSENS easyMAG        | St. Louis Children's Hospital       |
| WU-ER-5 <sup>†</sup>  | Rhinovirus     | R80 (HRVA)               | NucliSENS easyMAG        | St. Louis Children's Hospital       |
| WU-ER-6 <sup>†</sup>  | Rhinovirus     | R76 (HRVA)               | NucliSENS easyMAG        | St. Louis Children's Hospital       |
| WU-ER-7 <sup>†</sup>  | Rhinovirus     | R38 (HRVA)               | NucliSENS easyMAG        | St. Louis Children's Hospital       |
| WU-ER-8 <sup>†</sup>  | Rhinovirus     | R76 (HRVA)               | NucliSENS easyMAG        | St. Louis Children's Hospital       |
| WU-ER-9 <sup>†</sup>  | Rhinovirus     | R6 (HRVB)                | NucliSENS easyMAG        | St. Louis Children's Hospital       |
| WU-ER-10 <sup>†</sup> | Rhinovirus     | R69 (HRVB)               | NucliSENS easyMAG        | St. Louis Children's Hospital       |
| WU-ER-11 <sup>†</sup> | Rhinovirus     | W20 (HRVC)               | NucliSENS easyMAG        | St. Louis Children's Hospital       |
| WU-ER-12 <sup>†</sup> | Rhinovirus     | W36 (HRVC)               | NucliSENS easyMAG        | St. Louis Children's Hospital       |
| WU-ER-13 <sup>†</sup> | Rhinovirus     | R4 (HRVB)                | NucliSENS easyMAG        | St. Louis Children's Hospital       |
| WU-ER-14 <sup>†</sup> | Rhinovirus     | W38 (HRVC)               | NucliSENS easyMAG        | St. Louis Children's Hospital       |
| WU-ER-15 <sup>†</sup> | Rhinovirus     | W24 (HRVC)               | NucliSENS easyMAG        | St. Louis Children's Hospital       |
| WU-ER-16 <sup>†</sup> | Rhinovirus     | R3 (HRVB)                | NucliSENS easyMAG        | St. Louis Children's Hospital       |
| WU-ER-17 <sup>†</sup> | Rhinovirus     | R80 (HRVA)               | NucliSENS easyMAG        | St. Louis Children's Hospital       |
| WU-ER-18 <sup>†</sup> | Rhinovirus     | R026 (HRVC)              | NucliSENS easyMAG        | St. Louis Children's Hospital       |
| WU-ER-19 <sup>†</sup> | Rhinovirus     | R83 (HRVB)               | NucliSENS easyMAG        | St. Louis Children's Hospital       |
| WU-ER-20 <sup>†</sup> | Rhinovirus     | R5 (HRVA)                | NucliSENS easyMAG        | St. Louis Children's Hospital       |
| WU-ER-21 <sup>†</sup> | Rhinovirus     | R45 (HRVB)               | NucliSENS easyMAG        | St. Louis Children's Hospital       |
| WU-ER-22 <sup>†</sup> | Rhinovirus     | W36 (HRVC)               | NucliSENS easyMAG        | St. Louis Children's Hospital       |
| WU-ER-23 <sup>†</sup> | Enterovirus    | CVA16                    | NucliSENS easyMAG        | St. Louis Children's Hospital       |
| WU-ER-24 <sup>†</sup> | Enterovirus    | ECHO14                   | NucliSENS easyMAG        | St. Louis Children's Hospital       |
| WU-ER-25 <sup>‡</sup> | Rhinovirus     | R33 (HRVA)               | Roche Magna Pure Compact | St. Louis Children's Hospital       |
| WU-ER-26 <sup>‡</sup> | Rhinovirus     | R29/R44 (HRVA)           | Roche Magna Pure Compact | St. Louis Children's Hospital       |
| WU-ER-27 <sup>‡</sup> | Rhinovirus     | R46 (HRVA)               | Roche Magna Pure Compact | St. Louis Children's Hospital       |
| WU-ER-28 <sup>‡</sup> | Rhinovirus     | W10 (HRVC)               | Roche Magna Pure Compact | St. Louis Children's Hospital       |
| WU-ER-29 <sup>‡</sup> | Rhinovirus     | R52 (HRVB)               | Roche Magna Pure Compact | St. Louis Children's Hospital       |
| WU-ER-30 <sup>‡</sup> | Rhinovirus     | W33 (HRVC)               | Roche Magna Pure Compact | St. Louis Children's Hospital       |
| WU-ER-31 <sup>‡</sup> | Rhinovirus     | W46 (HRVC)               | Roche Magna Pure Compact | St. Louis Children's Hospital       |
| WU-ER-32 <sup>‡</sup> | Rhinovirus     | R81 (HRVA)               | Roche Magna Pure Compact | St. Louis Children's Hospital       |
| WU-ER-33 <sup>‡</sup> | Rhinovirus     | R60 (HRVA)               | Roche Magna Pure Compact | St. Louis Children's Hospital       |
| WU-ER-34 <sup>‡</sup> | Rhinovirus     | R15 (HRVA)               | Roche Magna Pure Compact | St. Louis Children's Hospital       |
| WU-ER-35 <sup>‡</sup> | Rhinovirus     | R68 (HRVA)               | Roche Magna Pure Compact | St. Louis Children's Hospital       |
| WU-ER-36 <sup>‡</sup> | Rhinovirus     | R14 (HRVB)               | Roche Magna Pure Compact | St. Louis Children's Hospital       |
| WU-ER-37 <sup>‡</sup> | Rhinovirus     | W50 (HRVC)               | Roche Magna Pure Compact | St. Louis Children's Hospital       |
| WU-ER-38 <sup>‡</sup> | Rhinovirus     | R3 (HRVB)                | Roche Magna Pure Compact | St. Louis Children's Hospital       |
| WU-ER-39 <sup>‡</sup> | Rhinovirus     | R83 (HRVB)               | Roche Magna Pure Compact | St. Louis Children's Hospital       |
| WU-ER-40 <sup>‡</sup> | Rhinovirus     | R25 (HRVA)               | Roche Magna Pure Compact | St. Louis Children's Hospital       |
| WU-ER-41 <sup>‡</sup> | Rhinovirus     | W24 (HRVC)               | Roche Magna Pure Compact | St. Louis Children's Hospital       |
| WU-ER-42 <sup>‡</sup> | Rhinovirus     | R22 (HRVA)               | Roche Magna Pure Compact | St. Louis Children's Hospital       |
| WU-ER-43 <sup>‡</sup> | Rhinovirus     | W41 (HRVC)               | Roche Magna Pure Compact | St. Louis Children's Hospital       |
| WU-ER-44 <sup>‡</sup> | Rhinovirus     | W6 (HRVC)                | Roche Magna Pure Compact | St. Louis Children's Hospital       |
| WU-ER-45 <sup>‡</sup> | Rhinovirus     | W4 (HRVC)                | Roche Magna Pure Compact | St. Louis Children's Hospital       |
| WU-ER-46 <sup>‡</sup> | Rhinovirus     | R10 (HRVA)               | Roche Magna Pure Compact | St. Louis Children's Hospital       |
| WU-ER-47 <sup>‡</sup> | Rhinovirus     | R49(HRVA)                | Roche Magna Pure Compact | St. Louis Children's Hospital       |
| WU-ER-48 <sup>‡</sup> | Rhinovirus     | R61 (HRVA)               | Roche Magna Pure Compact | St. Louis Children's Hospital       |
| WU-ER-49 <sup>‡</sup> | Rhinovirus     | R97 (HRVB)               | Roche Magna Pure Compact | St. Louis Children's Hospital       |
| WU-ER-50 <sup>‡</sup> | Rhinovirus     | R58 (HRVA)               | Roche Magna Pure Compact | St. Louis Children's Hospital       |
| WU-ER-51 <sup>‡</sup> | Rhinovirus     | R82 (HRVA)               | Roche Magna Pure Compact | St. Louis Children's Hospital       |
| WU-ER-52 <sup>‡</sup> | Rhinovirus     | R21 (HRVA)               | Roche Magna Pure Compact | St. Louis Children's Hospital       |
| WU-ER-53 <sup>‡</sup> | Rhinovirus     | R12 (HRVA)               | Roche Magna Pure Compact | St. Louis Children's Hospital       |
| WU-ER-54 <sup>‡</sup> | Rhinovirus     | R53 (HRVA)               | Roche Magna Pure Compact | St. Louis Children's Hospital       |
| WU-ER-55 <sup>‡</sup> | Rhinovirus     | R41 (HRVA)               | Roche Magna Pure Compact | St. Louis Children's Hospital       |
| WU-ER-56 <sup>‡</sup> | Rhinovirus     | R1B (HRVA)               | Roche Magna Pure Compact | St. Louis Children's Hospital       |
| WU-ER-57 <sup>‡</sup> | Rhinovirus     | R9 (HRVA)                | Roche Magna Pure Compact | St. Louis Children's Hospital       |
| WU-ER-58 <sup>‡</sup> | Rhinovirus     | R11 (HRVA)               | Roche Magna Pure Compact | St. Louis Children's Hospital       |
| WU-ER-59 <sup>‡</sup> | Rhinovirus     | R2 (HRVA)                | Roche Magna Pure Compact | St. Louis Children's Hospital       |
| WU-ER-60 <sup>‡</sup> | Rhinovirus     | R27 (HRVB)               | Roche Magna Pure Compact | St. Louis Children's Hospital       |
| WU-ER-61 <sup>‡</sup> | Rhinovirus     | W32 (HRVC)               | Roche Magna Pure Compact | St. Louis Children's Hospital       |
| WU-ER-62              | Enterovirus    | CVA7 (AB-IV)             | NucliSENS easyMAG        | Children's Hospital Colorado        |
| WU-ER-63              | Enterovirus    | EV71 (wild)              | NucliSENS easyMAG        | Children's Hospital Colorado        |
| WU-ER-64              | Enterovirus    | CVB5 (Faulkner)          | NucliSENS easyMAG        | Children's Hospital Colorado        |
| WU-ER-65              | Enterovirus    | ECHO 19 (Burke)          | NucliSENS easyMAG        | Children's Hospital Colorado        |
| WU-ER-66              | Enterovirus    | CVA9 (PB/Bozek)          | NucliSENS easyMAG        | Children's Hospital Colorado        |
| WU-ER-67              | Enterovirus    | CVB2 (LLC-MK2)           | NucliSENS easyMAG        | Children's Hospital Colorado        |
| WU-ER-68              | Enterovirus    | ECHO 11 (Gregory)        | NucliSENS easyMAG        | Children's Hospital Colorado        |
| WU-ER-69              | Enterovirus    | ECHO 30 (wild)           | NucliSENS easyMAG        | Children's Hospital Colorado        |
| WU-ER-70              | Enterovirus    | CVB3 (wild)              | NucliSENS easyMAG        | Children's Hospital Colorado        |
| WU-ER-71              | Enterovirus    | CVB1 (Conn-5)            | NucliSENS easyMAG        | Children's Hospital Colorado        |
| WU-ER-72              | Enterovirus    | CVB4 (JVB)               | NucliSENS easyMAG        | Children's Hospital Colorado        |
| WU-ER-73              | Enterovirus    | ECHO 3 (Morrisey)        | NucliSENS easyMAG        | Children's Hospital Colorado        |
| WU-ER-74              | Enterovirus    | ECHO 6 (DiAmori)         | NucliSENS easyMAG        | Children's Hospital Colorado        |
| WU-ER-75              | Enterovirus    | ECHO 4 (wild)            | NucliSENS easyMAG        | Children's Hospital Colorado        |
| WU-ER-76              | Enterovirus    | ECHO 5 (wild)            | NucliSENS easyMAG        | Children's Hospital Colorado        |
| WU-ER-77              | Enterovirus    | ECHO 1 (Farouk)          | NucliSENS easyMAG        | Children's Hospital Colorado        |
| WU-ER-78              | Enterovirus    | EV70 (J670/71)           | NucliSENS easyMAG        | Children's Hospital Colorado        |
| WU-ER-79              | Enterovirus    | ECHO 7                   | NucliSENS easyMAG        | Children's Hospital Colorado        |
| WU-ER-80              | Enterovirus    | EV2 (Cox A16 Group A)    | NucliSENS easyMAG        | New York State Department of Health |
| WU-ER-81              | Enterovirus    | EV3 (Echo 18 Group B)    | NucliSENS easyMAG        | New York State Department of Health |
| WU-ER-82              | Enterovirus    | EV4 (Cox A21 Group C)    | NucliSENS easyMAG        | New York State Department of Health |
| WU-ER-83              | Enterovirus    | EV5 (Echo 30 Group B)    | NucliSENS easyMAG        | New York State Department of Health |
| WU-ER-84              | Enterovirus    | EV6 (Cox A21 Group C)    | NucliSENS easyMAG        | New York State Department of Health |
| WU-ER-85              | Enterovirus    | EV7 (Echo 18 Group B)    | NucliSENS easyMAG        | New York State Department of Health |
| WU-ER-86              | Enterovirus    | EV10 (Entero 71 Group A) | NucliSENS easyMAG        | New York State Department of Health |
| WU-ER-87              | Enterovirus    | EV11 (Cox A16 Group A)   | NucliSENS easyMAG        | New York State Department of Health |
| WU-ER-88              | Enterovirus    | EV21 (Entero 71 Group A) | NucliSENS easyMAG        | New York State Department of Health |

CVA: Coxsackie A virus; CVB: Coxsackie B virus; ECHO: echovirus; EV: enterovirus

<sup>†</sup> Specimen collection funded by NIAID grant number R01AI097213.

<sup>‡</sup> Specimen collection funded by NIAID grant number U01AI077810.
